# Supplementary material for: A regional coupled ocean–atmosphere modeling framework(MITgcm–WRF) using ESMF/NUOPC: description and preliminary results for the Red Sea
Source: Copernicus journal article supplement (doi:10.5194/gmd-2018-252), 2018-11-29
Supplement: Supplementary file [file gmd-2018-252-AC1-supplement.pdf]

## Reply to executive editor (SC1)

Rui Sun, Aneesh C. Subramanian, Arthur J. Miller, Matthew R. Mazloff,  
Ibrahim Hoteit, Bruce D. Cornuelle

April 16, 2019

**Comment 1:** *Interactive comment on A regional coupled ocean–atmosphere modeling framework (MITgcm–WRF) using ESMF/NUOPC: description and preliminary results for the Red Sea by Rui Sun et al.*

*In my role as Executive editor of GMD, I would like to bring to your attention our Editorial version 1.1. This highlights some requirements of papers published in GMD, which is also available on the GMD website in the ‘Manuscript Types’ section. In particular, please note that for your paper, the following requirement has not been met in the Discussions paper:*

*“The main paper must give the model name and version number (or other unique identifier) in the title.”*

*Please provide the version numbers of MITgcm–WRF and ESMF/NUOPC in the title of your revised manuscript.*

**Reply 1:** The authors thank the executive editor for pointing out this issue.

We have revised the title to include the name and version of our model. The versions of the ocean/atmosphere model components and the ESMF coupler are also highlighted in the manuscript.

Now the title of the manuscript is: SCRIPS v1.0: A regional coupled ocean–atmosphere modeling framework (MITgcm–WRF) using ESMF/NUOPC, description and preliminary results for the Red Sea

**Comment 2:** *GMD is encouraging authors to upload the program code of models (including*

*relevant data sets) as supplement or make the code and data of the exact model version described in the paper accessible through a DOI (digital object identifier). In case your institution does not provide the possibility to make electronic data accessible through a DOI you may consider other providers (eg. zenodo.org or CERN) to create a DOI. Please note that in the code availability section you can still point the reader to how to obtain the newest version. If for some reason the code and/or data cannot be made available in this form the “Code Availability” section need to clearly state the reasons for why access is restricted (e.g. licensing reasons).*

*Especially, please note, that it is not enough, that the code will be available in the future. It must be available now and the exact version of the code published in this article needs to be made available.*

**Reply 2:** The authors thank the executive editor for pointing out this in the code availability section. We have uploaded our source code, test cases, and code documentation to a GitHub repository [https://github.com/iurnus/scripps\\_kaust\\_model](https://github.com/iurnus/scripps_kaust_model). This repository is now open to public. We have added the link of the GIT repository to the manuscript.
